# Supplementary material for: Neuroglia infection by rabies virus after anterograde virus spread in peripheral neurons
Source: PubMed Central journal article supplement (PMC7684951; doi:10.1186/s40478-020-01074-6), 2020-11-23
Supplement: 40478_2020_1074_MOESM1_ESM.pdf [file 40478_2020_1074_MOESM1_ESM.pdf]

## Neuroglia Infection by RABV after Anterograde Virus Spread in Peripheral Neurons

Madlin Potratz, Luca M. Zaack, Carlotta Weigel, Antonia Klein, Conrad M. Freuling, Thomas Müller, Stefan Finke

Friedrich-Loeffler-Institut (FLI), Federal Research Institute for Animal Health, Institute of Molecular Virology and Cell Biology, 17493 Greifswald-Insel Riems, Germany

Corresponding author: [stefan.finke@fli.de](mailto:stefan.finke@fli.de)

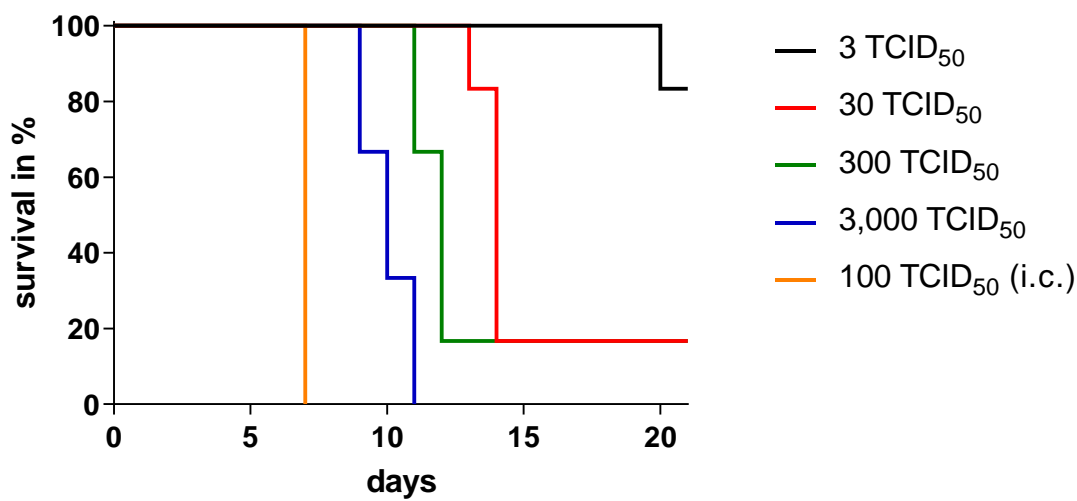

**Fig. S1: Kaplan-Meier survival plot of RABV infection experiment.** Comparison of dose-dependent survival of mice (six per group) after i.m. inoculation of rRABV Dog (3 to 3,000 TCID<sub>50</sub>). A control group of three mice i.c.-inoculated with 100 TCID<sub>50</sub> rRABV Dog is shown in orange.

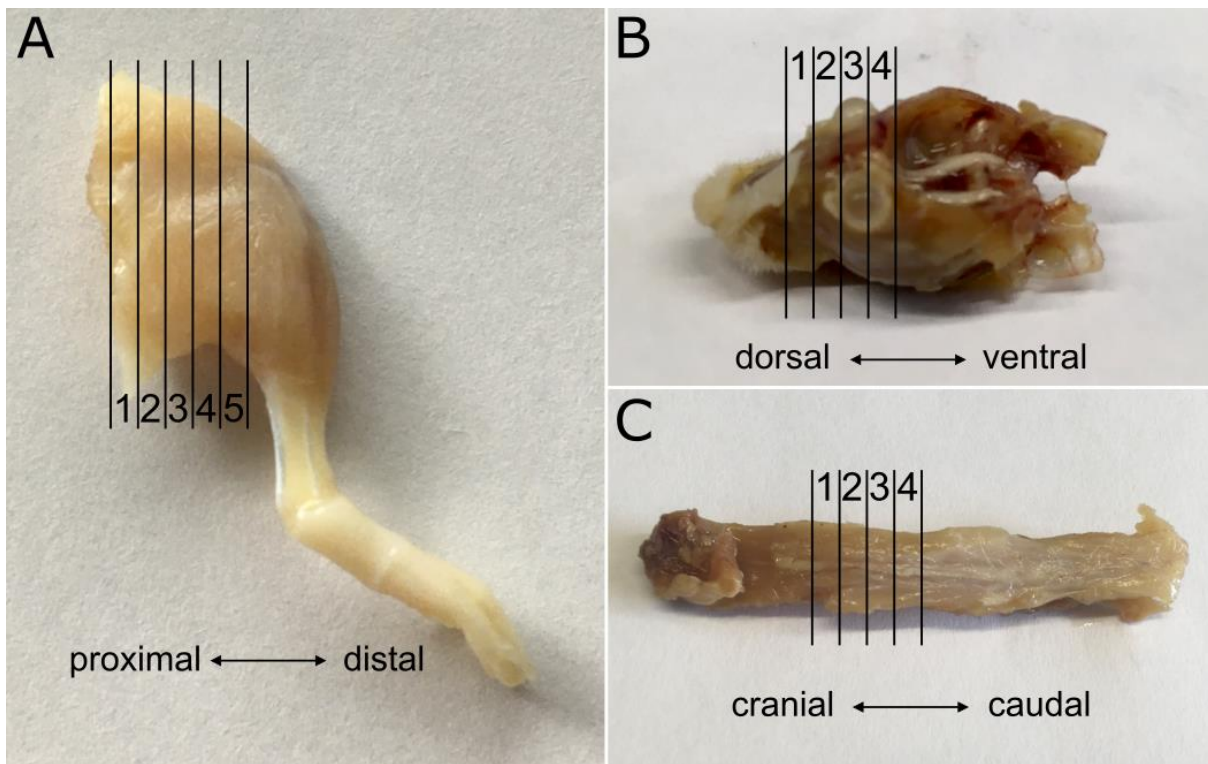

**Fig. S2: Cutting pattern of cross-sections from peripheral tissues of infected mice.** Hind legs (A), heads (B) and spinal columns (C) were decalcified and sectioned with a scalpel into several 1-2 mm thick slices.

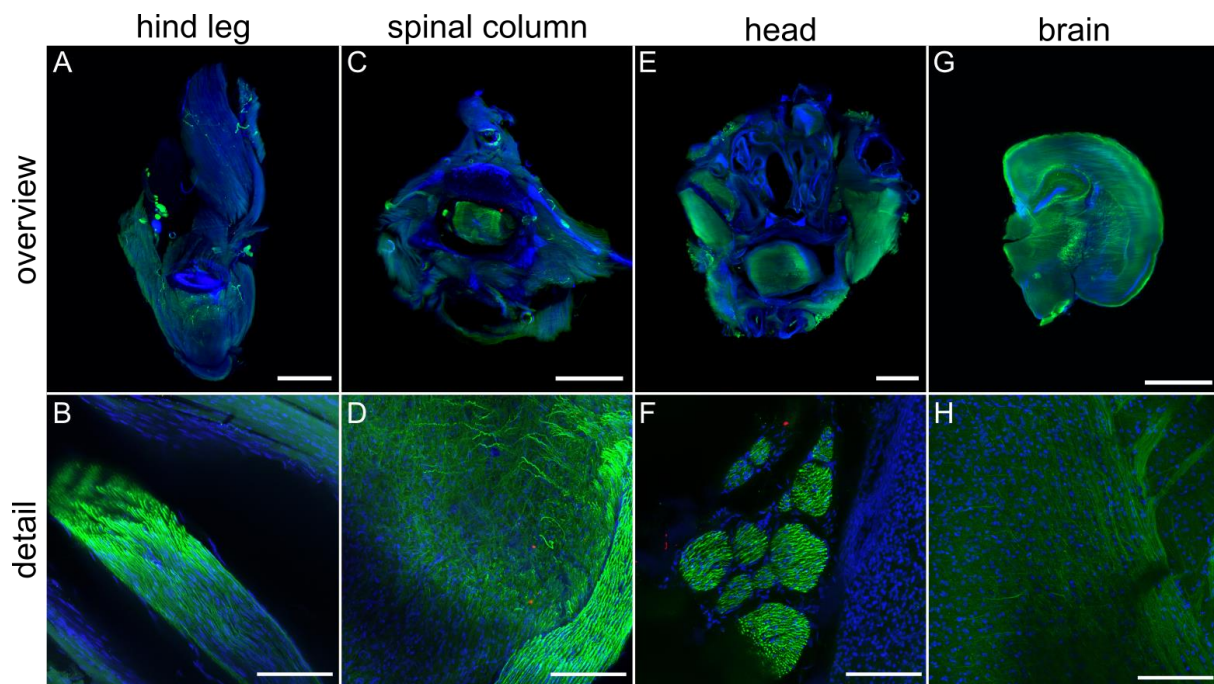

**Fig. S3: Non-infected peripheral mouse tissues after indirect immunofluorescence staining against RV-P (red), NEFM (green) and nuclei (blue).** Maximum z-projections of light sheet overviews and high-resolution confocal z-stacks from hind leg (A,B), spinal column (C,D), head (E,F) and brain (G,H). No RABV antigen was detected. Scale bar: 1,500  $\mu\text{m}$  (overview), 100  $\mu\text{m}$  (detail).

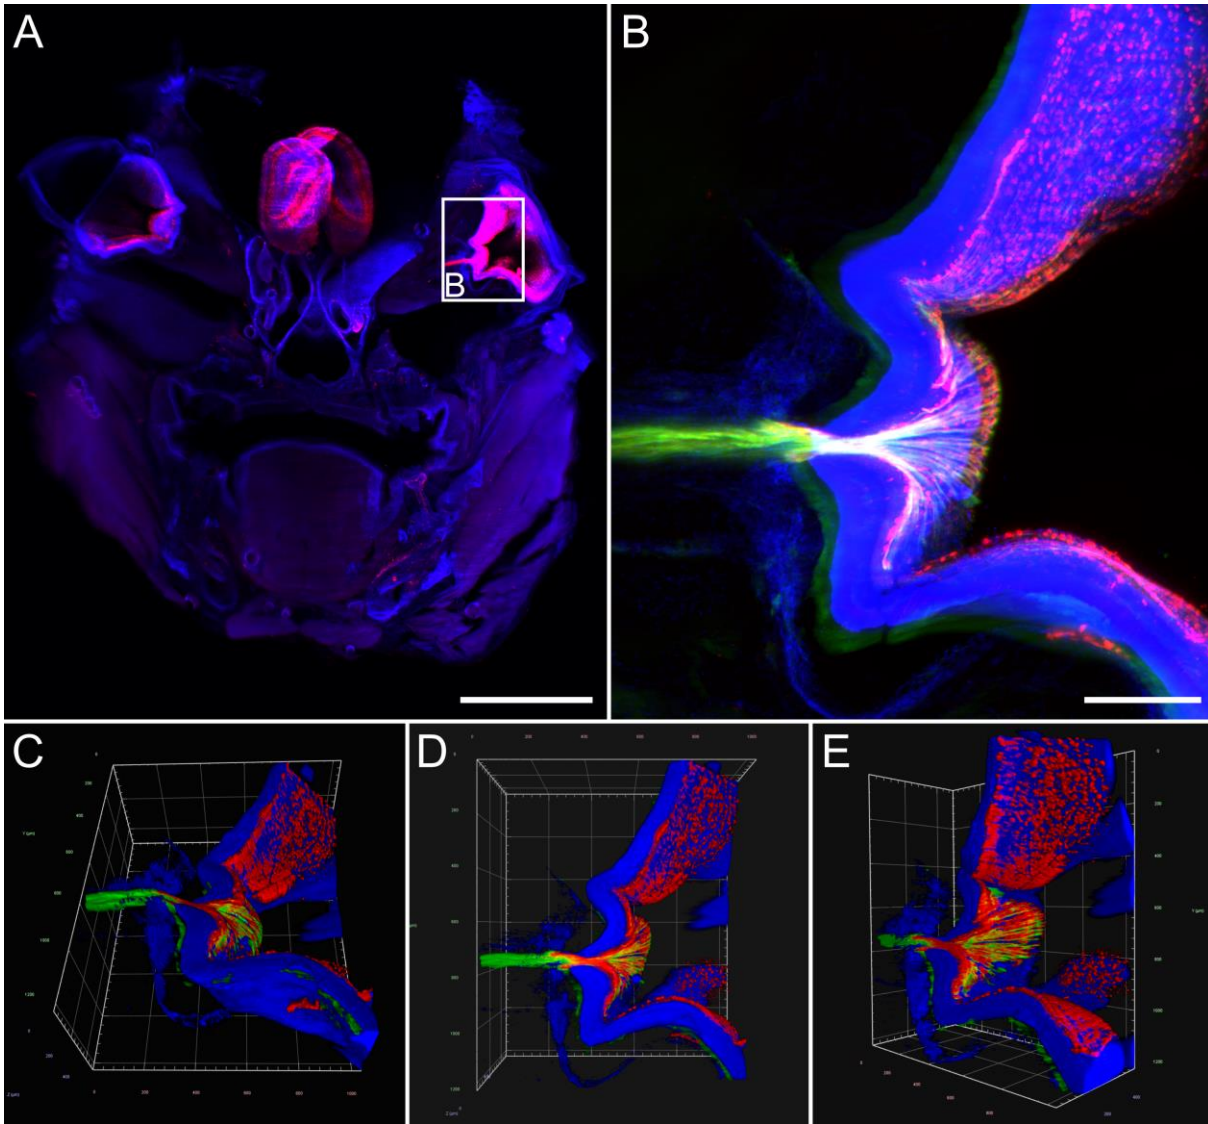

**Fig. S4: Field RABV infection of optic nerve and retina.** (A) Maximum z-projection of coronal mouse head section after i.c. inoculation [1.26x magnification,  $z = 1,760 \mu\text{m}$ , Scale bar  $2,000 \mu\text{m}$ ]. RV-P (red), nuclei (blue). (B) Maximum z-projection of detail from (A) (see white box) with a magnification of 12.6x. Green: NEFM. Scale bar:  $200 \mu\text{m}$ . (C-E) Respective 3D projections of (B). Different viewing angles of the infection of the orbital cavity, including the optic nerve, are shown.

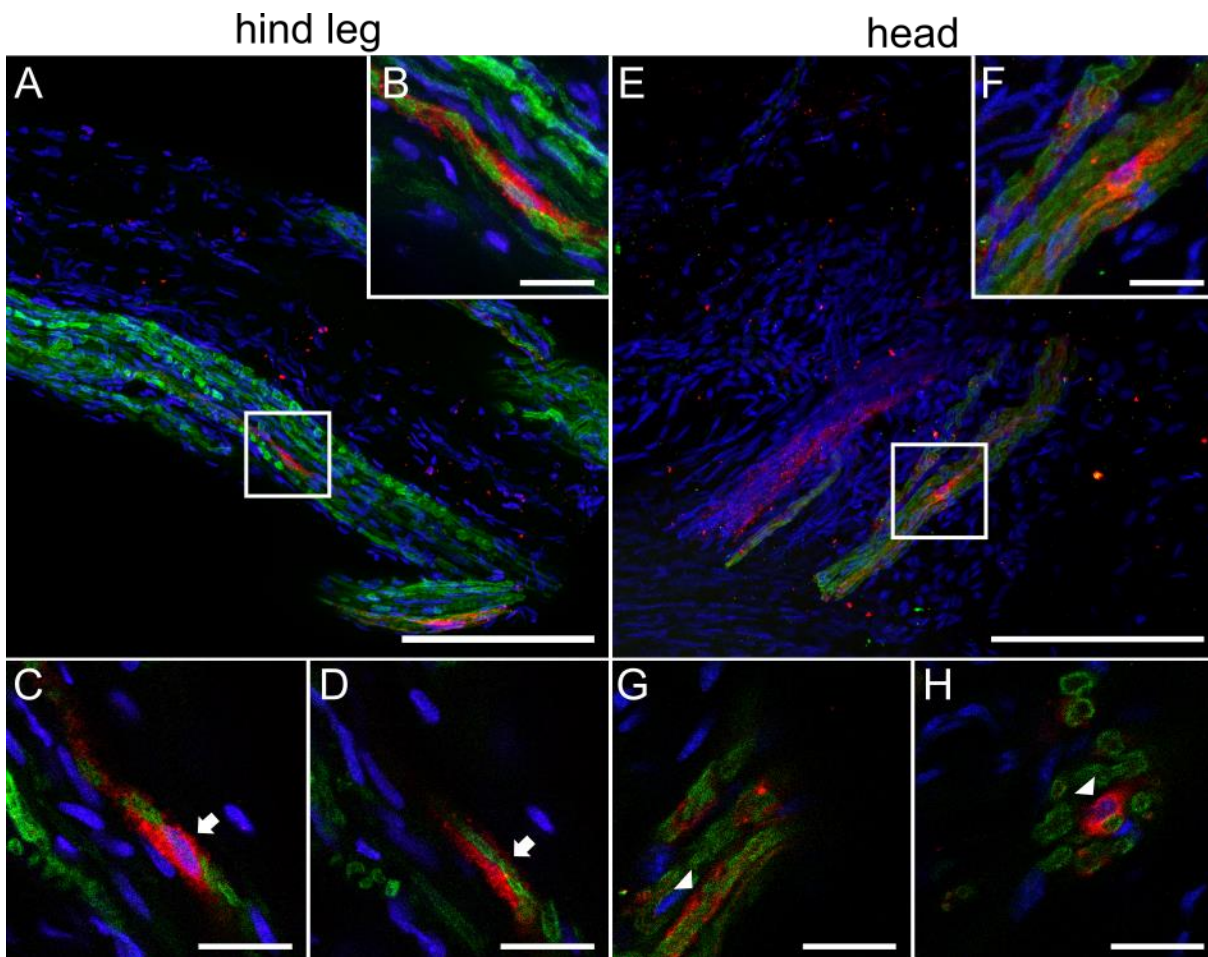

**Fig. S5: A different, bat-associated field RABV demonstrates a comparable pattern of RABV P in hind leg and head nerves, including infected Schwann cells, after i.m. inoculation.** (A,B) Maximum z-projection (A) and detail (B) of confocal high-resolution z-stacks of hind leg section from an i.m.-infected mice with RABV Bat [ $z = 55 \mu\text{m}$ ; Scale bar:  $100 \mu\text{m}$  (A),  $15 \mu\text{m}$  (B)]. Indirect immunofluorescence staining against RABV P (red), MBP (green), and nuclei (blue). Individual infected nerve fibers were detected, in which RABV P surrounds the MBP signals. (C,D) Single planes of detail view from (B). RABV P was detected around MBP signals (white arrows). Scale bar:  $15 \mu\text{m}$ . (E,F) Maximum z-projection of nerve fibers in coronal head sections after i.m. inoculation of RABV Bat [ $z = 31 \mu\text{m}$ ; Scale bar:  $100 \mu\text{m}$  (A),  $15 \mu\text{m}$  (B)]. Indirect immunofluorescence staining against RABV P (red), MBP (green) and nuclei (blue). (G,H) Single planes of detail view from (F). RABV P signals were located around MBP structures (white arrowheads). Scale bar:  $15 \mu\text{m}$ .

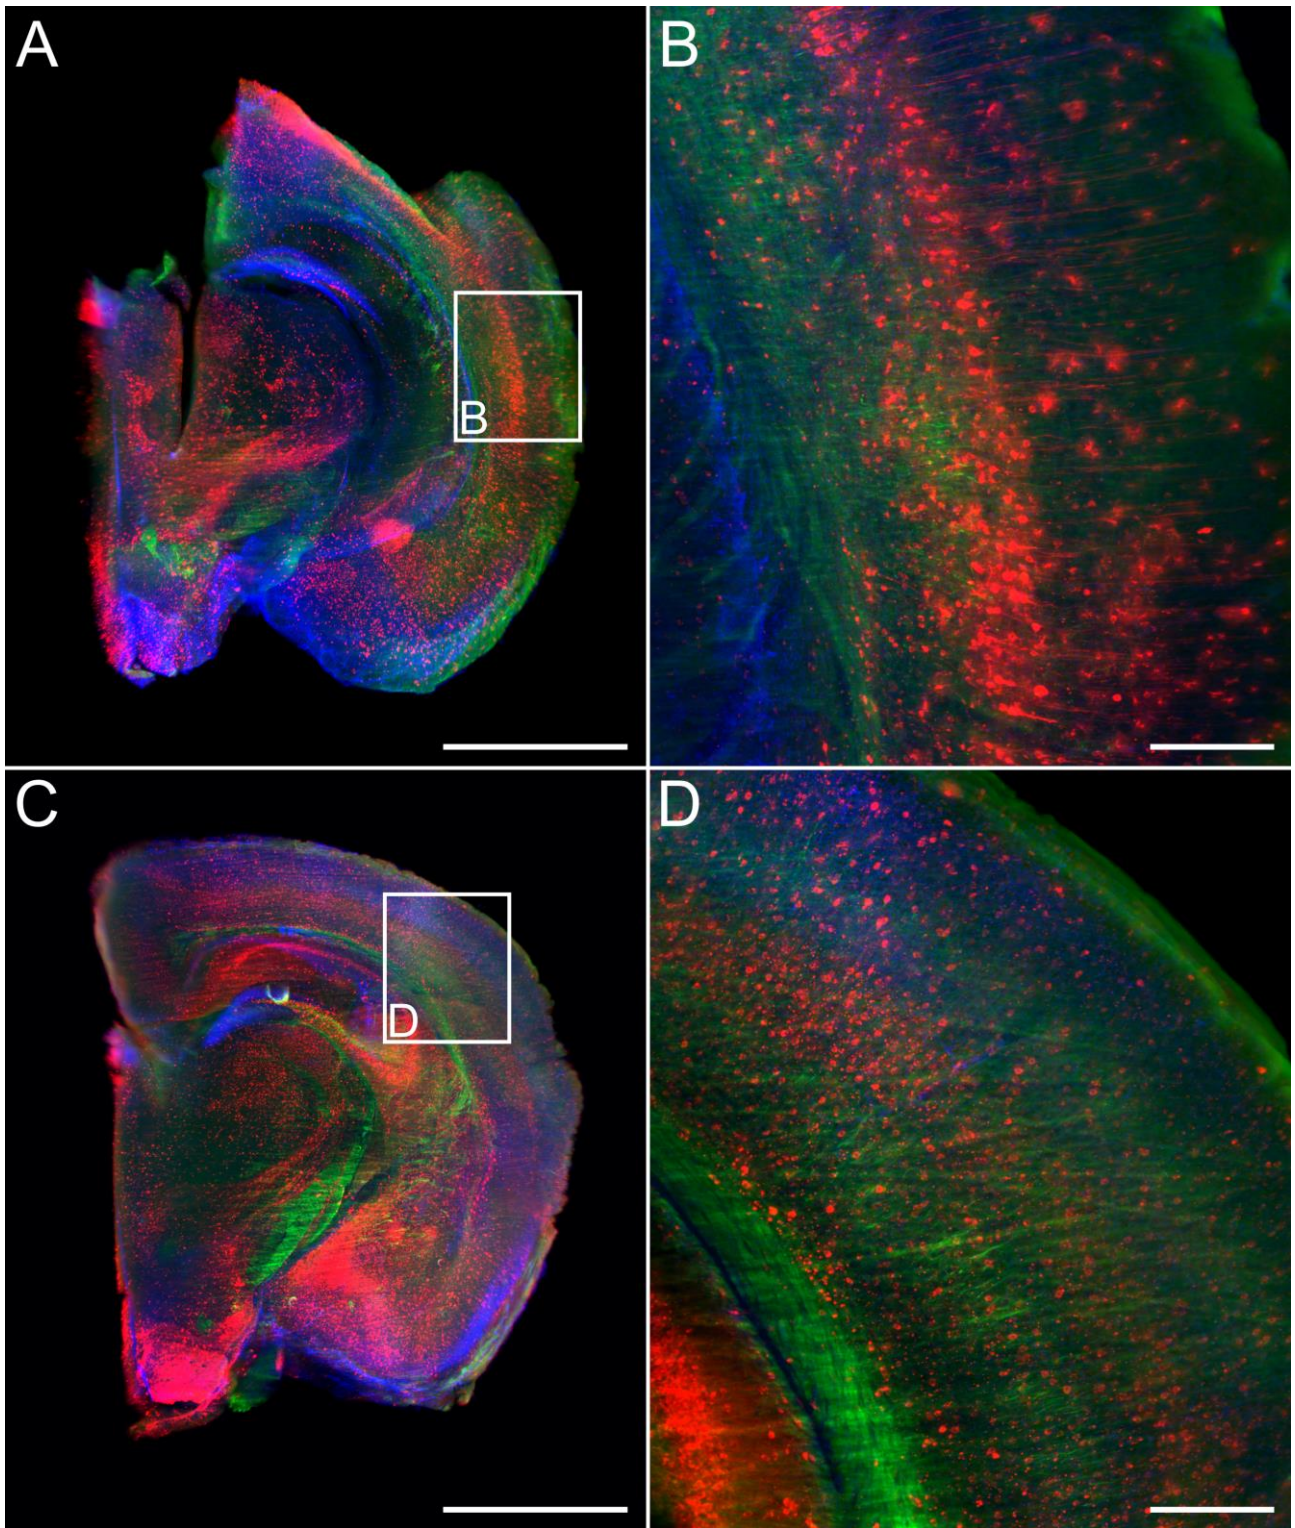

**Fig. S6: Comparison of field RABV-infected brains after i.m. and i.c. inoculation in clinically diseased mice (10 and 7 days post-inoculation, respectively).** (A,C) Independent of the inoculation route, the brains of i.m.- (A) and i.c. (C)-infected mice exhibited massive RABV infection throughout multiple areas of the brain, confirming strong CNS replication independent of the inoculation route. [2.5x magnification; [z = 1,282  $\mu$ m (A), 1,384  $\mu$ m (B)]. RABV P = red, NEFM = green, nuclei = blue. Scale bar: 1,500  $\mu$ m. (B,D) Maximum z-projection of details (white boxes) of A and C with magnification of [12.6x; z = 1,130  $\mu$ m (B), 386  $\mu$ m (D)]. Scale bar: 200  $\mu$ m.
